# Supplementary material
Source: PubMed Central journal article supplement (PMC3387899)
Supplement: supp_peds.2011-0774_zpe612117815p.pdf [file supp_peds.2011-0774_zpe612117815p.pdf]

## Supplemental Information

**SUPPLEMENTARY TABLE 5** Detailed Characteristics of the 838 Children Admitted to a PICU With Confirmed or Probable 2009 H1N1 in the United States (May 1, 2009, to April 15, 2010)

| Characteristic                       | <i>n</i> (%) |
|--------------------------------------|--------------|
| Gender                               |              |
| Male                                 | 485 (57.9)   |
| Female                               | 353 (42.1)   |
| Age group <sup>a</sup>               |              |
| <6 mo                                | 71 (8.5)     |
| 6–23 mo                              | 113 (13.5)   |
| 2–4 y                                | 131 (15.6)   |
| 5–12 y                               | 336 (40.1)   |
| 13–17 y                              | 157 (18.7)   |
| 18–20 y                              | 30 (3.6)     |
| Ethnicity <sup>b</sup>               |              |
| Hispanic or Latino                   | 229 (27.3)   |
| Non-Hispanic or Latino               | 525 (62.6)   |
| Not reported                         | 84 (10.0)    |
| Race <sup>b</sup>                    |              |
| White                                | 458 (54.7)   |
| Black                                | 168 (20.0)   |
| Asian, Hawaiian, or Pacific Islander | 45 (5.4)     |
| Native American                      | 8 (1.0)      |
| Other or not reported                | 159 (19.0)   |
| Underlying health conditions         |              |
| Previously healthy (none)            | 251 (30.0)   |
| ≥1 underlying condition              | 587 (70.0)   |
| Chronic respiratory                  | 356 (42.5)   |
| Asthma                               | 258 (30.8)   |
| On controller medications            | 155 (18.5)   |
| Bronchopulmonary dysplasia           | 36 (4.3)     |
| Other chronic lung disease           | 116 (13.8)   |
| Chronic ventilator support           | 27 (3.2)     |
| ≤12 h/d                              | 14 (1.7)     |
| >12 h/d                              | 13 (1.6)     |
| Tracheostomy                         | 62 (7.4)     |
| Neurologic or neuromuscular          | 263 (31.4)   |
| Seizure disorder                     | 139 (16.6)   |
| Cerebral palsy                       | 70 (8.4)     |
| Developmental delay                  | 199 (23.7)   |
| Spina bifida                         | 4 (0.5)      |
| Cerebrovascular disease              | 2 (0.2)      |
| Other neurologic disease             | 76 (9.1)     |
| Cardiovascular                       | 80 (9.5)     |
| Congenital heart disease             | 58 (6.9)     |
| Valvular heart disease               | 6 (0.7)      |
| Congestive heart failure             | 6 (0.7)      |
| Hypertension                         | 17 (2.0)     |
| Arrhythmia                           | 5 (0.6)      |
| Peripheral vascular disease          | 1 (0.1)      |

**SUPPLEMENTARY TABLE 5** Continued

| Characteristic                         | n (%)      |
|----------------------------------------|------------|
| Gastrointestinal or hepatic            | 80 (9.5)   |
| Gastrointestinal disease               | 79 (9.4)   |
| Cirrhosis                              | 4 (0.5)    |
| Metabolic                              | 37 (4.4)   |
| Diabetes                               | 24 (2.9)   |
| Other metabolic condition (ACIP)       | 15 (1.8)   |
| Immune compromise                      | 33 (3.9)   |
| Current/active metastatic solid cancer | 6 (0.7)    |
| Current/active hematologic malignancy  | 9 (1.1)    |
| Other immunosuppression (ie, BMT)      | 18 (2.1)   |
| Renal                                  | 10 (1.2)   |
| Chronic renal insufficiency            | 7 (0.8)    |
| Renal failure requiring dialysis       | 4 (0.5)    |
| Hemoglobinopathy                       | 22 (2.6)   |
| Other chronic condition                | 126 (15)   |
| Medication use before admission        |            |
| Statins                                | 4 (0.5)    |
| Corticosteroids <sup>b</sup>           | 73 (8.7)   |
| Nonsteroidal immunosuppressive agents  | 27 (3.2)   |
| ACE inhibitors                         | 14 (1.7)   |
| Anti-influenza agents                  | 49 (5.8)   |
| Clinical features on presentation      |            |
| Fever                                  | 664 (79.2) |
| Cough                                  | 608 (72.6) |
| Shortness of breath                    | 452 (53.9) |
| Vomiting                               | 250 (29.8) |
| Rhinorrhea                             | 214 (25.5) |
| Wheezing                               | 184 (22.0) |
| Fatigue                                | 174 (20.8) |
| Diarrhea                               | 100 (11.9) |
| Seizures                               | 83 (9.9)   |
| Sore throat                            | 74 (8.8)   |
| Nausea                                 | 63 (7.5)   |
| Altered awareness                      | 60 (7.2)   |
| Headache                               | 56 (6.7)   |
| Myalgias                               | 53 (6.3)   |
| Chills                                 | 23 (2.7)   |

ACIP indicates Advisory Committee on Immunization Practices, Centers for Disease Control and Prevention; BMT, bone marrow transplant; ACE, angiotensin-converting enzyme.

<sup>a</sup> The median age of the patients was 6 years (range: 6 days to 20 years).

<sup>b</sup> Race or ethnic group was reported in the clinical chart.

<sup>c</sup> More than 20 mg/day prednisone equivalent for adults and >0.3 mg/kg per day for patients younger than 18 years for any duration within 6 months of ICU admission.

**SUPPLEMENTARY TABLE 6** Detailed Characteristics of Bacterial Organisms Identified From Lower Respiratory Specimens of Patients With 2009 H1N1 Collected Within 72 Hours of PICU Admission

| Bacterial Organisms                       | n (%)    |
|-------------------------------------------|----------|
| MRSA                                      | 34 (4.1) |
| Methicillin-susceptible <i>S aureus</i>   | 37 (4.4) |
| <i>Pseudomonas</i> (all species)          | 30 (3.6) |
| <i>Streptococcus pneumoniae</i>           | 15 (1.8) |
| <i>Moraxella catarrhalis</i>              | 14 (1.7) |
| <i>Haemophilus influenzae</i>             | 13 (1.6) |
| <i>Streptococcus pyogenes</i>             | 7 (0.8)  |
| Other bacteria                            | 54 (6.4) |
| <i>Acinetobacter</i> species              | 2 (0.2)  |
| <i>Alcaligenes faecalis</i>               | 1 (0.1)  |
| <i>Bordetella pertussis</i>               | 2 (0.2)  |
| <i>Burkholderia cepacia</i>               | 1 (0.1)  |
| <i>Enterobacter</i> species               | 11 (1.3) |
| <i>Escherichia coli</i>                   | 3 (0.4)  |
| <i>Klebsiella pneumoniae</i>              | 2 (0.2)  |
| <i>Morganella morganii</i>                | 1 (0.1)  |
| <i>Mycoplasma</i>                         | 1 (0.1)  |
| <i>Prevotella</i> species                 | 1 (0.1)  |
| <i>Proteus mirabilis</i>                  | 1 (0.1)  |
| <i>Serratia marcescens</i>                | 6 (0.7)  |
| <i>Stenotrophomonas maltophilia</i>       | 4 (0.5)  |
| Other <i>Streptococcus</i> species        | 8 (1.0)  |
| Other Gram-positive cocci (not speciated) | 14 (1.7) |
| Other Gram-positive rods (not speciated)  | 1 (0.1)  |
| Other Gram-negative rods (not speciated)  | 8 (1.0)  |
| Other Gram-negative cocci (not speciated) | 10 (1.2) |

Some patients had polymicrobial culture-confirmed infections.

**SUPPLEMENTARY TABLE 7** Characteristics of Patients With pH1N1-Associated Encephalitis During PICU Course

| Age <sup>a</sup> | Comorbidity                    | Clinical Presentation                         | Seizure in ICU | Mechanical Ventilation     | Length of Hospital Stay, d | Outcome  | Discharge Location |
|------------------|--------------------------------|-----------------------------------------------|----------------|----------------------------|----------------------------|----------|--------------------|
| Infant           | Previously healthy             | Respiratory failure                           | Yes            | Invasive (ETT)/noninvasive | 4                          | Survived | Home               |
| Preschool        | Previously healthy             | Suspected CNS infection, respiratory failure  | No             | Invasive (ETT)             | 2                          | Survived | Home               |
| Preschool        | Previously healthy             | Suspected CNS infection, seizure              | Yes            | None                       | 12                         | Survived | Home               |
| Preschool        | Seizure disorder               | Respiratory failure, Inc seizures             | No             | Invasive (ETT)             | 28                         | Died     | —                  |
| Preschool        | Previously healthy             | Suspected CNS infection, alternative location | No             | Invasive (ETT)             | 1                          | Died     | —                  |
| Preschool        | Previously healthy             | Respiratory failure, cardiac arrest           | No             | Invasive (ETT)             | 30                         | Survived | Rehab hospital     |
| Child            | Previously healthy             | Suspected CNS infection, alternative location | Yes            | Invasive (ETT)             | 31                         | Survived | Rehab hospital     |
| Child            | Previously healthy             | Suspected CNS infection, seizures             | Yes            | None                       | 2                          | Survived | Home               |
| Child            | Immune compromised, asthma, CP | Suspected CNS infection                       | No             | Invasive (ETT)             | 8                          | Died     | —                  |
| Child            | Seizure disorder               | Respiratory failure, Inc seizures             | Yes            | Invasive (ETT)             | 1                          | Died     | —                  |
| Adolescent       | Previously healthy             | Suspected CNS infection, respiratory failure  | No             | Invasive (ETT)             | 3                          | Survived | Home               |
| Adolescent       | Previously healthy             | Suspected CNS infection                       | Yes            | None                       | 6                          | Survived | Home               |
| Adolescent       | Seizure disorder               | Suspected CNS infection, seizure              | Yes            | Noninvasive                | 28                         | Survived | Rehab hospital     |
| Adolescent       | Type 1 diabetes                | Suspected CNS infection                       | No             | Invasive (ETT)             | 4                          | Survived | Home               |

Diagnosis of encephalitis was made by MRI, high cerebrospinal fluid protein level, or clinical diagnosis by neurologist at study hospital. CNS indicates central nervous system; ETT, endotracheal tube; CP, cerebral palsy.

<sup>a</sup> Age ranges: neonate,  $\leq 30$  days; infant  $>30$  days to  $<1$  year; toddler, 1 to  $\leq 2$  years; preschool, 3 to  $\leq 5$  years; child, 6 to  $\leq 12$  years; adolescent, 13 to  $\leq 17$  years; and adult, 18 to  $\leq 21$  years.

**SUPPLEMENTARY TABLE 8** Children With a Clinical Diagnosis of pH1N1-Associated Myocarditis as the Primary Reason Underlying PICU Admission

| Age <sup>a</sup> | Comorbidities          | Clinical Presentation        | Thrombocytopenia <sup>b</sup> | Neutropenia <sup>c</sup> | Highest Troponin, ng/mL/CPK Level, U/L | Echo | LVEF, % | ECMO (d) | Length of Hospital Stay, d | Outcome  |
|------------------|------------------------|------------------------------|-------------------------------|--------------------------|----------------------------------------|------|---------|----------|----------------------------|----------|
| Toddler          | Previously healthy     | Shock requiring vasopressors | No                            | No                       | NA/NA                                  | No   | —       | No       | 18                         | Survived |
| Child            | Seizure disorder       | Cardiac arrest               | No                            | No                       | 15.5 (I)/NA                            | Yes  | 15      | Yes (7)  | 21                         | Survived |
| Adolescent       | Previously healthy     | Lower respiratory infection  | NA                            | NA                       | 71.6 (I)/2455                          | Yes  | 55      | No       | 5                          | Survived |
| Adolescent       | Previously healthy     | Respiratory failure, shock   | Yes                           | No                       | 3.7 (I)/405                            | Yes  | 16      | Yes (14) | $>90$                      | Survived |
| Adolescent       | Hematologic malignancy | Lower respiratory infection  | Yes                           | Yes                      | NA/NA                                  | Yes  | 14      | Yes (15) | 17                         | Died     |
| Adolescent       | Previously healthy     | Lower respiratory infection  | Yes                           | No                       | 1.2 (I)/1748                           | Yes  | Unknown | No       | 1                          | Died     |

CPK indicates creatine phosphokinase; Echo, echocardiography; LVEF, left ventricular ejection fraction; NA, not applicable/not obtained; (I), troponin I; (T), troponin T.

<sup>a</sup> Age ranges: toddler, 1 to  $\leq 2$  years; child, 6 to  $\leq 12$  years; and adolescent, 13 to  $\leq 17$  years.

<sup>b</sup> Closest to ICU admission  $\pm 2$  days:  $<150 \times 10^9/\text{mL}$ .

<sup>c</sup> Closest to ICU admission  $\pm 2$  days:  $<500$  cells per mL.

**SUPPLEMENTARY TABLE 9** Demographic Factors, Chronic Health Conditions, Clinical Conditions, and Secondary Infections Tested in Multivariable Analyses

| Parameter                                 | RR (95% CI)    | <i>P</i> |
|-------------------------------------------|----------------|----------|
| Overall cohort ( <i>N</i> = 838)          |                |          |
| Female gender                             | 1.9 (1.2–3.0)  | .003     |
| Age 5–20 vs 0–4 y                         | 1.2 (0.8–2.0)  | .4       |
| Neurologic condition                      | 1.8 (1.1–2.7)  | .01      |
| Immune compromise                         | 2.2 (1.1–4.5)  | .02      |
| Metabolic disorder                        | 1.9 (0.9–4.0)  | .08      |
| Encephalitis diagnosed                    | 3.4 (1.6–7.5)  | .002     |
| Myocarditis diagnosed                     | 3.8 (1.2–12.0) | .03      |
| MRSA coinfection (lung) within ≤72 h      | 3.3 (1.7–6.4)  | .0005    |
| Previously healthy only ( <i>N</i> = 251) |                |          |
| Female gender                             | 1.2 (0.5–2.6)  | .8       |
| Age 5–20 vs 0–4 y                         | 1.5 (0.6–3.9)  | .4       |
| Encephalitis diagnosed                    | 2.3 (0.3–14.9) | .4       |
| Myocarditis diagnosed                     | 5.1 (0.9–30.0) | .07      |
| MRSA coinfection (lung) within ≤72 h      | 8.0 (3.9–20.6) | <.0001   |

Patients with the factor were compared to patients without the factor for those patients for whom the factor was reported. The multivariate analysis excluded catheter-related bloodstream infection.

**SUPPLEMENTARY TABLE 10** Characteristics of Previously Healthy Patients With pH1N1 and *Staphylococcus aureus* Coinfection of the Lung

| Age <sup>a</sup> | Infection, Source | Clinical Presentation                        | Shock Requiring Vasopressors <sup>b</sup> | Thrombocytopenia <sup>c</sup> | Neutropenia <sup>d</sup> | Time to Appropriate Antibiotics <sup>e</sup> | Lowest P/F Ratio | Ventilation/ECMO | Hospital Stay, d | Outcome  |
|------------------|-------------------|----------------------------------------------|-------------------------------------------|-------------------------------|--------------------------|----------------------------------------------|------------------|------------------|------------------|----------|
| Infant           | MSSA, ET          | LRTI, shock, respiratory failure             | Yes                                       | NA                            | NA                       | 13 h after ICU admit                         | 215              | MV               | 32               | Survived |
| Infant           | MSSA, ET          | Respiratory failure                          | Yes                                       | No                            | No                       | 9 h after ICU admit                          | 262              | MV               | 66               | Survived |
| Infant           | MSSA, ET          | LRTI, shock, respiratory failure             | Yes                                       | Yes                           | Yes                      | 15 h before ICU admit                        | 68               | MV/ECMO          | 20               | Died     |
| Toddler          | MSSA, ET          | LRTI, respiratory failure                    | No                                        | No                            | No                       | 5 h before ICU admit                         | NA               | MV               | 3                | Survived |
| Child            | MSSA, ET          | LRTI, shock, respiratory failure             | Yes                                       | Yes                           | Yes                      | 3 h before ICU admit                         | 93               | MV/ECMO          | 29               | Died     |
| Child            | MSSA, ET          | Respiratory failure, shock                   | Yes                                       | No                            | No                       | 30 min before ICU admit                      | 182              | MV               | 22               | Survived |
| Child            | MSSA, ET          | Respiratory failure, shock                   | Yes                                       | Yes                           | No                       | 4.5 h before ICU admit                       | 113              | MV               | 59               | Survived |
| Child            | MSSA, ET          | LRTI, respiratory failure                    | Yes                                       | No                            | No                       | 4 h after ICU admit                          | 73               | MV               | 22               | Survived |
| Adolescent       | MSSA, ET          | Respiratory failure                          | No                                        | Yes                           | No                       | Unknown                                      | 126              | MV               | 28               | Survived |
| Adolescent       | MSSA, ET          | LRTI, respiratory failure                    | Yes                                       | No                            | No                       | 4 h before ICU admit                         | 106              | MV               | 27               | Survived |
| Adolescent       | MSSA, ET          | LRTI, shock, respiratory failure             | Yes                                       | Yes                           | No                       | 15 h before ICU admit                        | 83               | MV               | 34               | Survived |
| Infant           | MRSA, ET          | Cardiac arrest, respiratory failure          | Yes                                       | No                            | No                       | None, comfort measures only                  | 243              | MV               | 10               | Died     |
| Toddler          | MRSA, ET          | Respiratory failure                          | No                                        | No                            | No                       | 10 d after ICU admit                         | 377              | MV               | 20               | Survived |
| Toddler          | MRSA, empyema     | LRTI                                         | No                                        | No                            | No                       | 3 h before ICU admit                         | NA               | None             | 12               | Survived |
| Toddler          | MRSA, ET          | Suspected CNS infection, respiratory failure | No                                        | No                            | No                       | 1.5 h before ICU admit                       | 230              | MV               | 2                | Died     |
| Preschool        | MRSA, ET          | LRTI, shock, respiratory failure             | Yes                                       | NA                            | NA                       | 2 h after ICU admit                          | 97               | MV/ECMO          | 20               | Died     |
| Preschool        | MRSA, ET          | LRTI, respiratory failure                    | No                                        | No                            | No                       | 6 h after ICU admit                          | 76               | MV               | 22               | Survived |
| Child            | MRSA, ET          | LRTI, respiratory failure                    | Yes                                       | No                            | NA                       | At ICU admit                                 | 53               | MV/ECMO          | 44               | Survived |
| Child            | MRSA, ET          | LRTI, shock, respiratory failure             | Yes                                       | No                            | Yes                      | At ICU admit                                 | 83               | MV/ECMO          | 35               | Died     |
| Child            | MRSA, ET          | LRTI, shock, respiratory failure             | Yes                                       | Yes                           | Yes                      | 45 min after ICU admit                       | 74               | MV/ECMO          | 24               | Survived |
| Child            | MRSA, ET          | LRTI, shock, respiratory failure             | Yes                                       | No                            | Yes                      | 3 h after ICU admit                          | 144              | MV               | 11               | Survived |
| Child            | MRSA, ET          | LRTI, shock, respiratory failure             | Yes                                       | Yes                           | Yes                      | 1 h before ICU admit                         | 149              | MV               | 15               | Survived |
| Child            | MRSA, ET          | LRTI, shock, respiratory failure             | Yes                                       | Yes                           | NA                       | 1.5 h before ICU admit                       | 40               | MV/ECMO          | 124              | Died     |
| Child            | MRSA, ET          | LRTI, shock, respiratory failure             | Yes                                       | Yes                           | No                       | 1 h before ICU admit                         | 237              | MV               | 20               | Survived |
| Adolescent       | MRSA, ET          | Respiratory failure, shock                   | Yes                                       | Yes                           | Yes                      | 12 h before ICU admit                        | 77               | MV               | 53               | Survived |
| Adolescent       | MRSA, ET          | LRTI, shock, respiratory failure             | Yes                                       | No                            | Yes                      | 2 h after ICU admit                          | 41               | MV/ECMO          | 13               | Died     |

P/F, PaO<sub>2</sub>/FiO<sub>2</sub>; MSSA, methicillin-susceptible *S aureus*; ETI, endotracheal tube; LRTI, lower respiratory tract infection; NA, not applicable/not obtained; MV, mechanical ventilation; empyema, empyema fluid; CNS, central nervous system.

<sup>a</sup>Age ranges: toddler, 1 to ≤2 years; child, 6 to ≤12 years; and adolescent, 13 to ≤17 years.

<sup>b</sup>During hospitalization, any intravenous dopamine at >5 μg/kg per minute or any norepinephrine, epinephrine, or phenylephrine.

<sup>c</sup>Closest to ICU admission ± 2 days: <150 × 10<sup>9</sup>/mL.

<sup>d</sup>Closest to ICU admission ± 2 days: <1500 cells per mL.

<sup>e</sup>Any penicillin, cephalosporin, linezolid, or vancomycin for methicillin-susceptible *S aureus*; vancomycin or linezolid for MRSA.
